# Supplementary material for: In Vivo Imaging of Schlemm's Canal and Limbal Vascular Network in Mouse Using Visible-Light OCT
Source: PubMed Central journal article supplement — Invest Ophthalmol Vis Sci. 2020 Feb 18;61(2):23. doi: 10.1167/iovs.61.2.23 (PMC7326574; doi:10.1167/iovs.61.2.23), 2020-02-18
Supplement: iovs-61-2-23_s003.pdf [file iovs-61-2-23_s003.pdf]

## Supplementary Materials

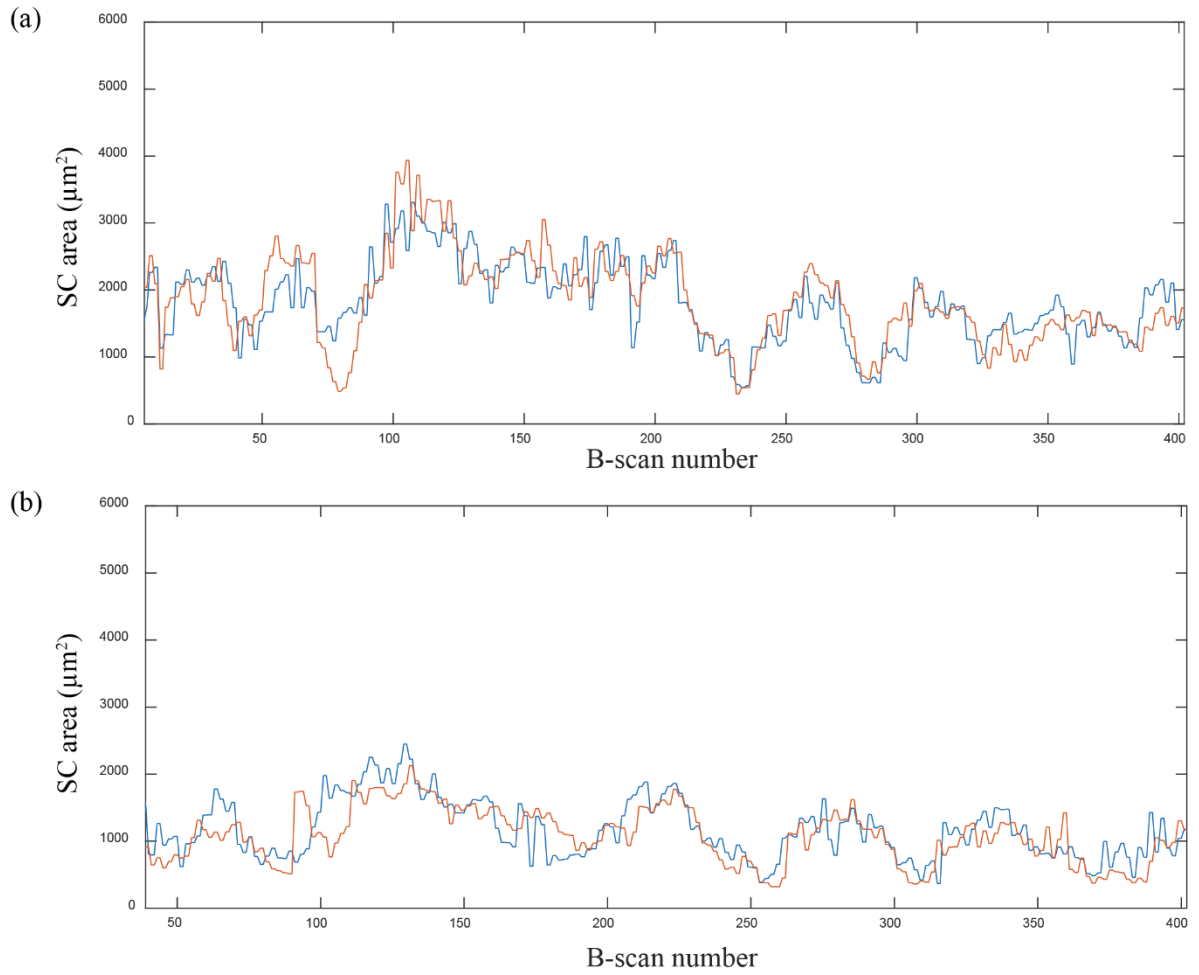

**Figure S1.** (a) and (b) are plots of the measured cross-sectional SC area from 400 B-scans after correcting for lateral displacement. (a) compares two  $\Delta$ -10 datasets acquired sequentially and (b) compares two  $\Delta$ +5 datasets acquired non-sequentially.
